# Supplementary material for: Human gastrointestinal conditions affectin vitrodigestibility of peanut and bread proteins
Source: Royal Society of Chemistry journal article supplement (doi:10.1039/d0fo01451f), 2020-01-01
Supplement: d0fo01451f1.pdf [file d0fo01451f1.pdf]

## Human gastrointestinal conditions affect *in vitro* digestibility of peanut and bread proteins

Amelia Torcello-Gómez,<sup>a,\*</sup> Didier Dupont,<sup>b</sup> Julien Jardin,<sup>b</sup> Valérie Briard-Bion,<sup>b</sup> Amélie Deglaire,<sup>b</sup>  
Kerstin Risse,<sup>a,1</sup> Elodie Mechoulan,<sup>a,2</sup> and Alan Mackie<sup>a,\*</sup>

<sup>a</sup>School of Food Science and Nutrition, University of Leeds, Leeds LS2 9JT, UK

<sup>b</sup>STLO, INRAE, Institut Agro, 35042 Rennes, France

\*Corresponding authors: m.a.torcellogomez@leeds.ac.uk (A. Torcello-Gómez),  
a.r.mackie@leeds.ac.uk (A. Mackie)

<sup>1</sup>Present address: Institute of Food Technology and Food Chemistry, Faculty III Process Sciences,  
Technical University of Berlin, Koenigin-Luise-Str. 22, 14195 Berlin, Germany

<sup>2</sup>Present address: Institute of Technology, University of Angers, 4 Boulevard de Lavoisier, 49000  
Angers, France

**Table S1:** Electrolyte composition of the simulated salivary (SSF), gastric (SGF) and intestinal (SIF) fluids of the *in vitro* digestion protocols.

|                                                   | <sup>1</sup> | <b>Infant<sup>2</sup></b> |     | <b>Early phase adult<sup>1</sup></b> |      | <b>Late phase adult<sup>3</sup></b> |
|---------------------------------------------------|--------------|---------------------------|-----|--------------------------------------|------|-------------------------------------|
| <b>[mM]</b>                                       | SSF          | SGF                       | SIF | SGF                                  | SIF  | SGF                                 |
| NaCl                                              | -            | 94                        | 164 | 47.2                                 | 38.4 | 35                                  |
| KCl                                               | 15.1         | 13                        | 10  | 6.9                                  | 6.8  | -                                   |
| KH <sub>2</sub> PO <sub>4</sub>                   | 3.7          | -                         | -   | 0.9                                  | 0.8  | -                                   |
| NaHCO <sub>3</sub>                                | 13.6         | -                         | 85  | 25                                   | 85   | -                                   |
| MgCl <sub>2</sub> (H <sub>2</sub> O) <sub>6</sub> | 0.15         | -                         | -   | 0.1                                  | 0.33 | -                                   |
| (NH <sub>4</sub> ) <sub>2</sub> CO <sub>3</sub>   | 0.06         | -                         | -   | 0.5                                  | -    | -                                   |
| CaCl <sub>2</sub> <sup>a</sup>                    | 1.5          | -                         | 3   | 0.15                                 | 0.6  | -                                   |
| <b>pH</b> (adjusted with 1 M HCl)                 | 7            | 5.3                       | 6.6 | 3                                    | 7    | 1.2                                 |

<sup>a</sup>CaCl<sub>2</sub> is added separately during the *in vitro* digestion experiments.

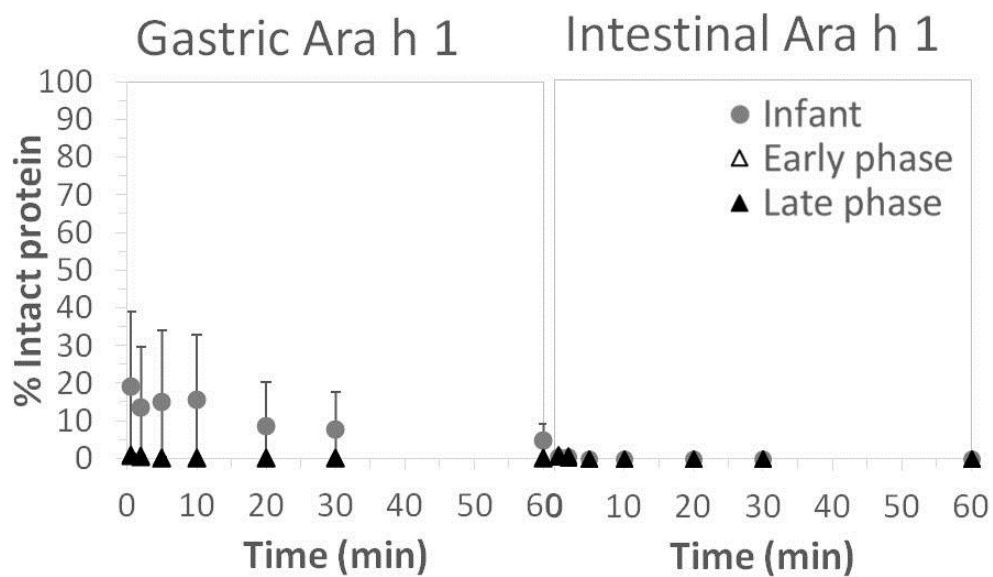

**Figure S1:** Percentage of intact isolated protein Ara h 1 within the gastric or intestinal phase (infant, early phase or late phase models) determined from densitometry on SDS-PAGE ( $n \geq 2$ ) in Figure 1A. Different letters mean significant differences ( $p \leq 0.05$ ) between models over time. Absence of letters means no significant differences.

Densitometry on bands was performed with the software Image Lab™ 5.1 (Bio-Rad). Data are presented as mean values  $\pm$  standard deviation. Comparison between *in vitro* digestion models over time was done with two-way ANOVA and post hoc Bonferroni multiple comparison test with a threshold for significance  $p \leq 0.05$ .

## References

1. M. Minekus, M. Alminger, P. Alvito, S. Ballance, T. Bohn, C. Bourlieu, F. Carriere, R. Boutrou, M. Corredig, D. Dupont, C. Dufour, L. Egger, M. Golding, S. Karakaya, B. Kirkhus, S. Le Feunteun, U. Lesmes, A. Macierzanka, A. Mackie, S. Marze, D. J. McClements, O. Menard, I. Recio, C. N. Santos, R. P. Singh, G. E. Vegarud, M. S. J. Wickham, W. Weitschies and A. Brodkorb, A standardised static in vitro digestion method suitable for food - an international consensus, *Food Funct.*, 2014, **5**, 1113-1124.
2. O. Menard, C. Bourlieu, S. C. De Oliveira, N. Dellarosa, L. Laghi, F. Carriere, F. Capozzi, D. Dupont and A. Deglaire, A first step towards a consensus static in vitro model for simulating full-term infant digestion, *Food Chem.*, 2018, **240**, 338-345.
3. K. Thomas, M. Aalbers, G. A. Bannon, M. Bartels, R. J. Dearman, D. J. Esdaile, T. J. Fu, C. M. Glatt, N. Hadfield, C. Hatzos, S. L. Hefle, J. R. Heylings, R. E. Goodman, B. Henry, C. Herouet, M. Holsapple, G. S. Ladics, T. D. Landry, S. C. MacIntosh, E. A. Rice, L. S. Privalle, H. Y. Steiner, R. Teshima, R. van Ree, M. Woolhiser and J. Zawodny, A multi-laboratory evaluation of a common in vitro pepsin digestion assay protocol used in assessing the safety of novel proteins, *Regul. Toxicol. Pharm.*, 2004, **39**, 87-98.
